# Supplementary material for: Testosterone and sex hormone-binding globulin in dysglycemic women at high cardiovascular risk: A report from the Outcome Reduction with an Initial Glargine Intervention trial
Source: PubMed Central journal article supplement (PMC8481727; doi:10.1177/14791641211002475), 2021-03-22
Supplement: sj-pdf-1-dvr-10.1177_14791641211002475.pdf [file sj-pdf-1-dvr-10.1177_14791641211002475.pdf]

## Supplementary table 1

**Table S1:** Interactions analyses for sex hormones with cardiovascular events and all-cause mortality by study allocation and previously established CVD\*.

| Variable                                   | Cardiovascular events |        | All-cause mortality |        |
|--------------------------------------------|-----------------------|--------|---------------------|--------|
|                                            | Estimate              | p      | Estimate            | p      |
| By study allocation <sup>a</sup>           |                       |        |                     |        |
| Total testosterone                         | 0.0000                | 0.9903 | -0.0013             | 0.3475 |
| Free testosterone                          | 0.0171                | 0.7848 | -0.0541             | 0.4366 |
| SHBG levels                                | 0.0017                | 0.6859 | 0.0012              | 0.7575 |
| By previously established CVD <sup>b</sup> |                       |        |                     |        |
| Total testosterone                         | 0.0023                | 0.0881 | 0.0015              | 0.2822 |
| Free testosterone                          | 0.0902                | 0.1555 | 0.1078              | 0.1211 |
| SHBG levels                                | -0.0012               | 0.7696 | -0.0025             | 0.5274 |

\*defined as previous MI, stroke or revascularization, or angina with documented ischemia.

<sup>a</sup> Model B adjusted for glargine allocation interaction with variable of interest

<sup>b</sup> Model B adjusted for previously established CVD interaction with variable of interest
